# Supplementary material for: Pan-cancer analysis of the prognostic and immunological role of PAQR4
Source: Springer Nature journal article supplement (doi:10.1038/s41598-022-25220-3), 2022-12-08
Supplement: MOESM1 [file 41598_2022_25220_MOESM1_ESM.pdf]

# Supplementary Material

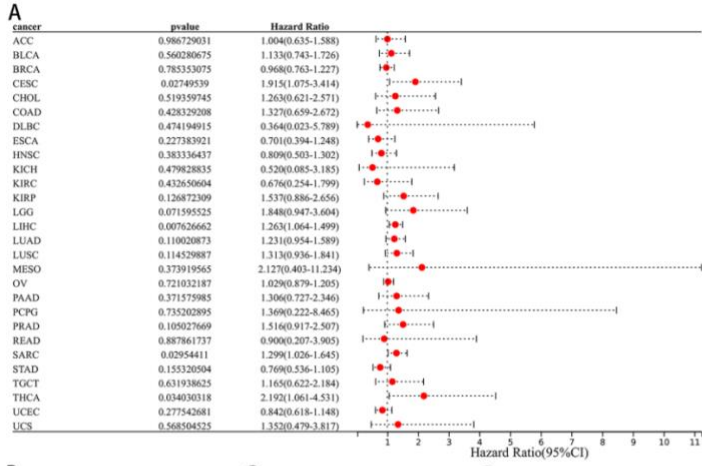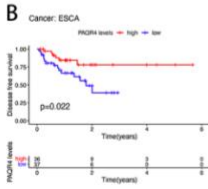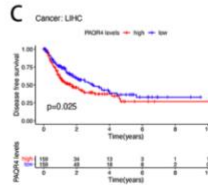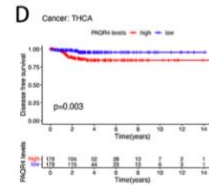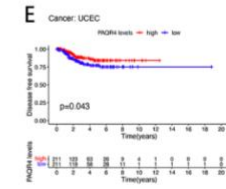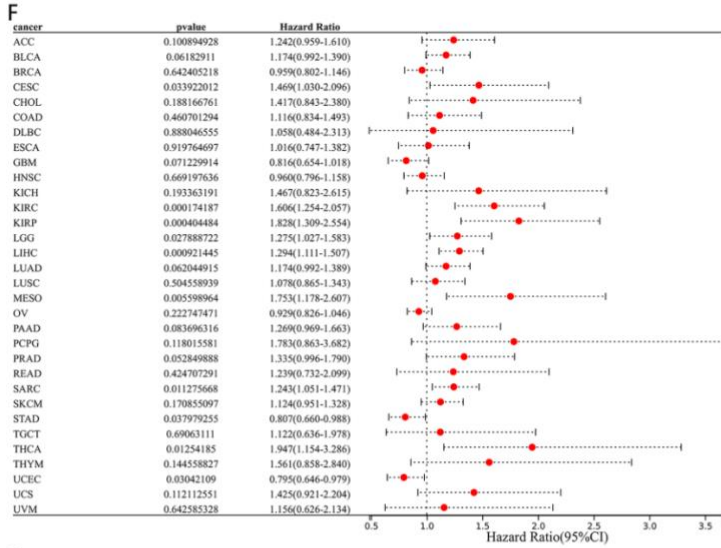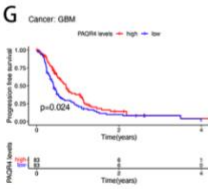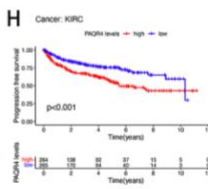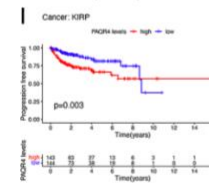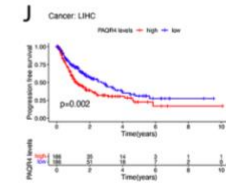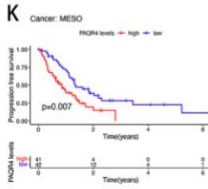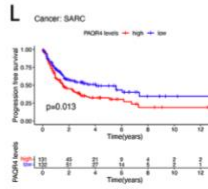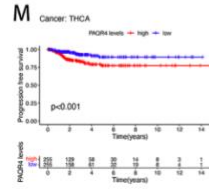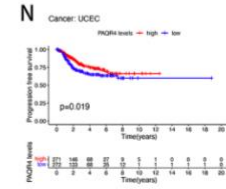

**Supplementary Figure 1.** Prognostic value of PAQR4 in pan-cancer. (A) Forest plot of the association between PAQR4 and disease-free survival (DFS) in 28 tumors. (B-E) Kaplan-Meier analysis of the association between PAQR4 expression and DFS in each tumor. (F) Forest plot of the association between PAQR4 and progression-free survival (PFS) in 32 tumors. (G-N) Kaplan-Meier analysis of the association between PAQR4 expression and PFS in each tumor.

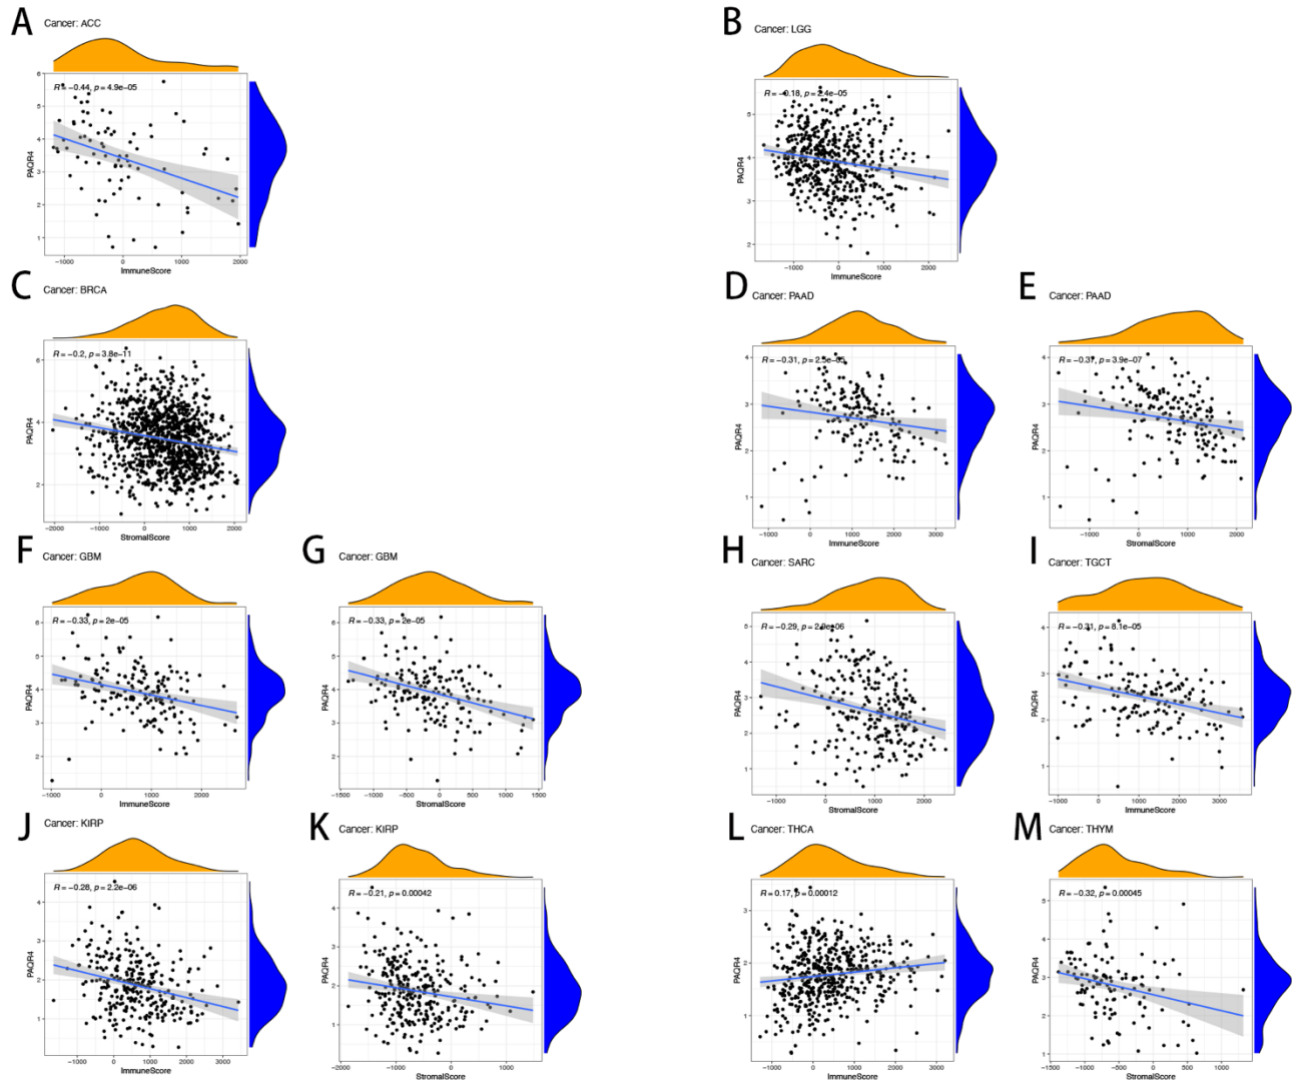

**Supplementary Figure 2.** Association of PAQR4 expression with immune score and stromal score in a variety of tumors.

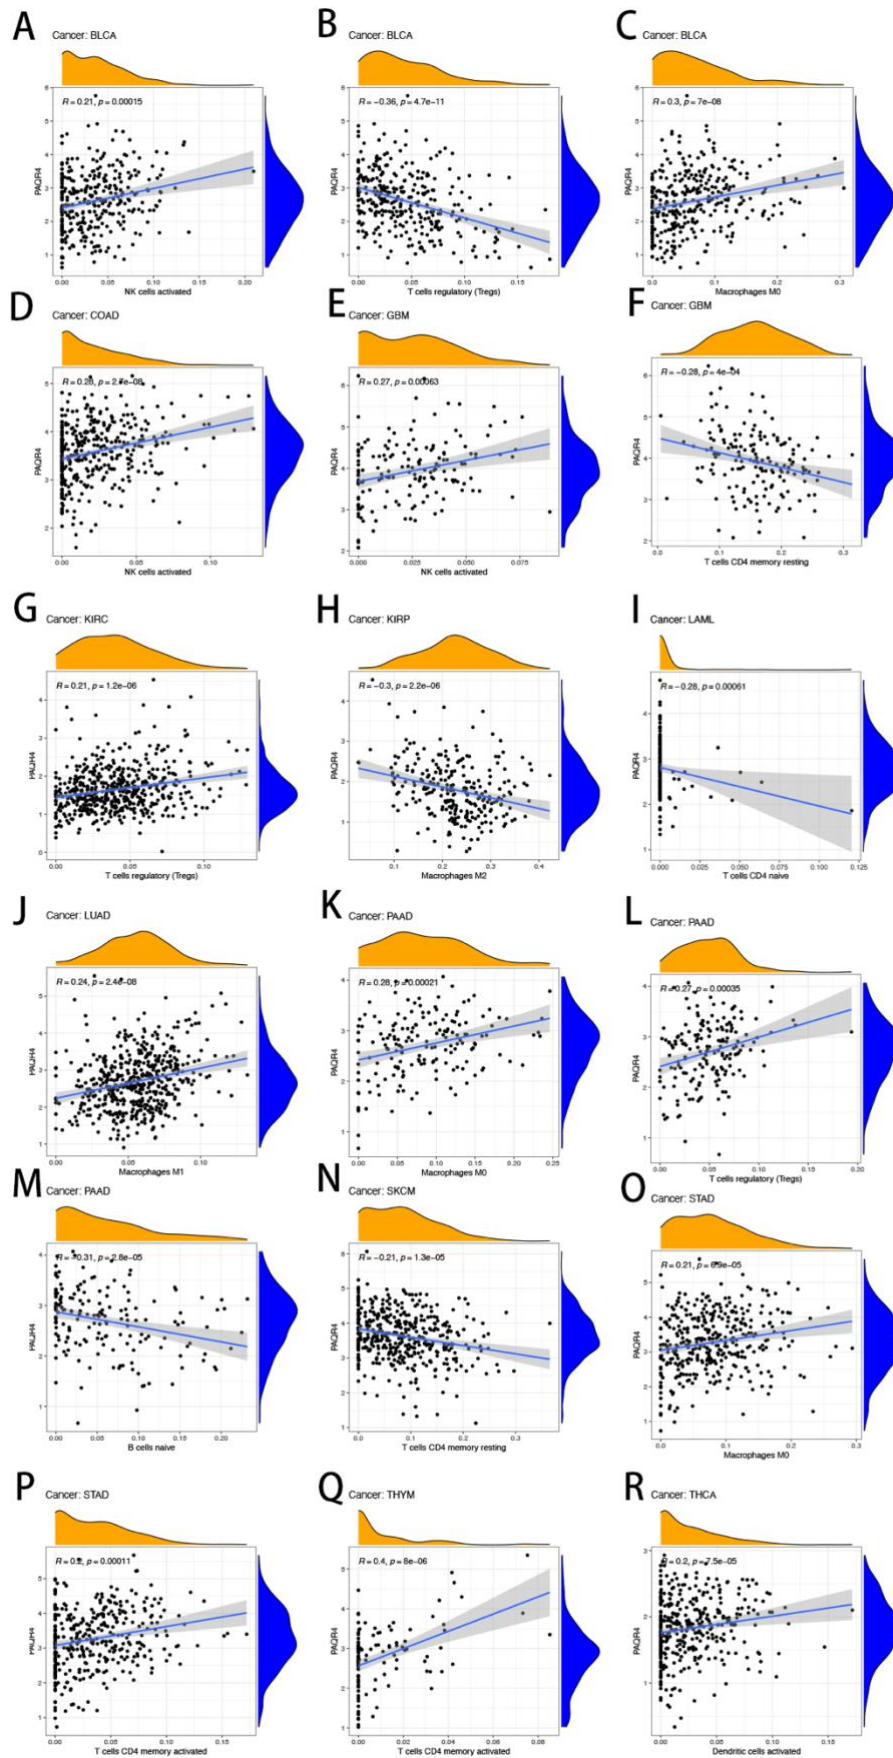

**Supplementary Figure 3.** Association of PAQR4 expression with immune cell infiltration in a variety of tumors.

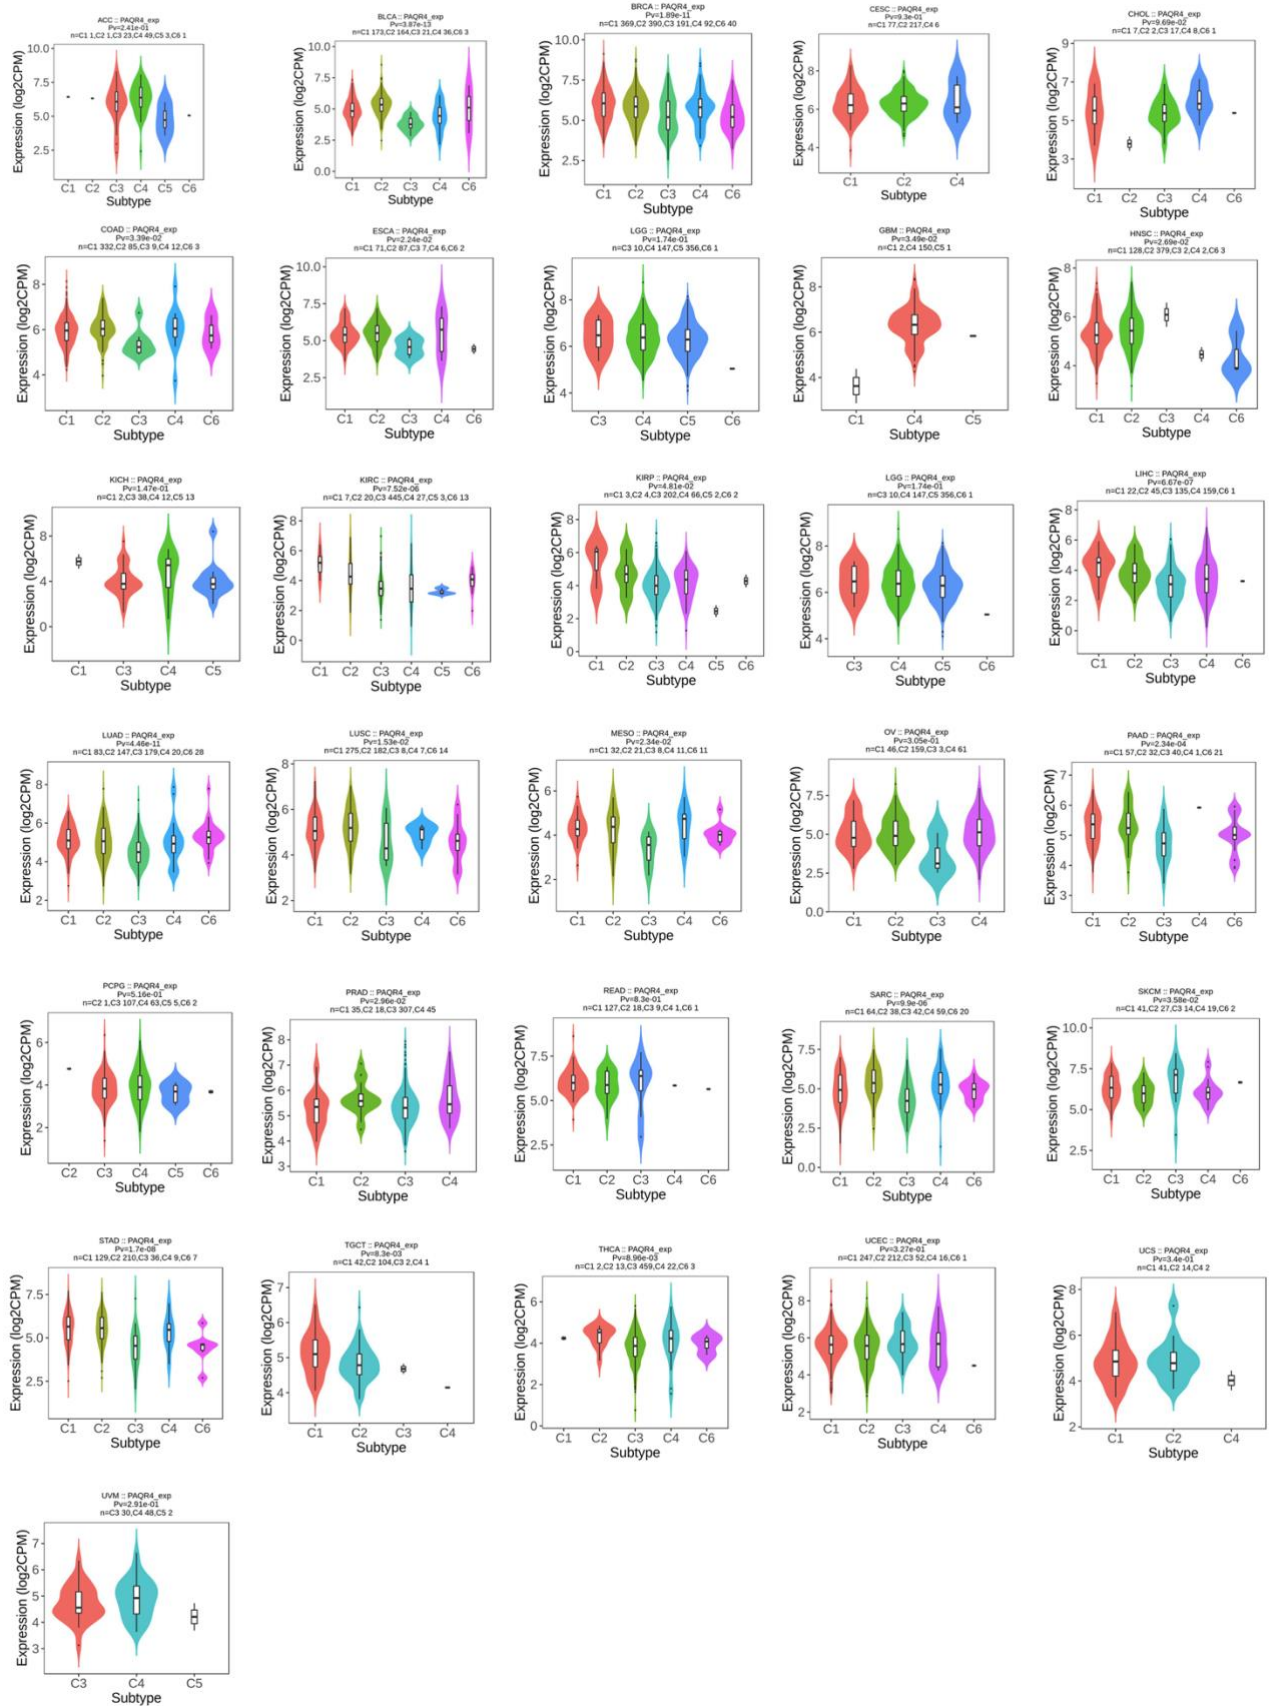

**Supplementary Figure 4.** Relationship between PAQR4 expression and tumor immune subtypes in the TISIDB database.

A

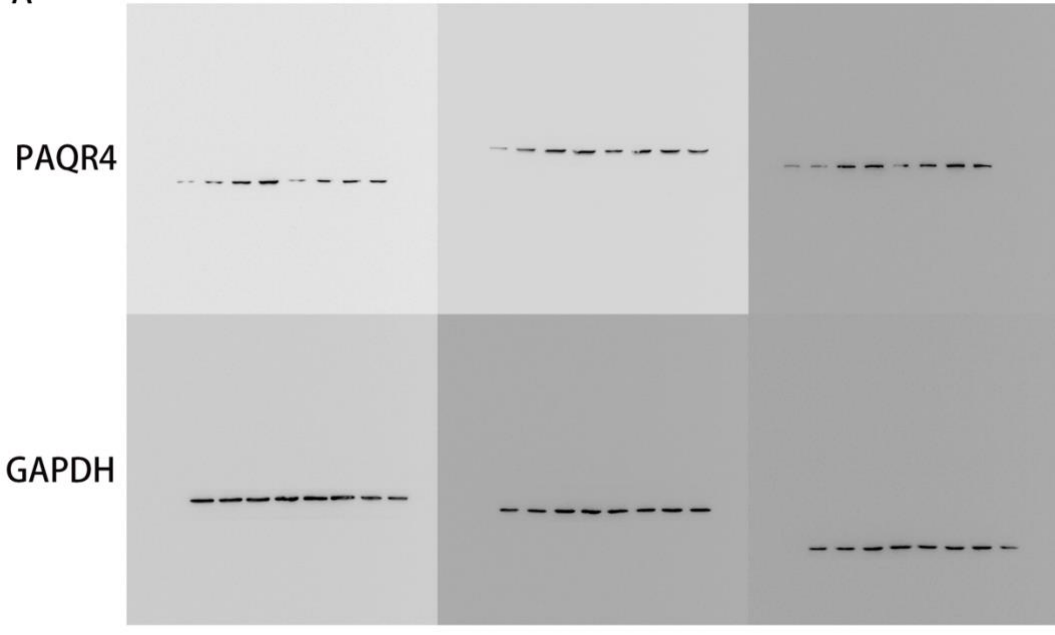

B

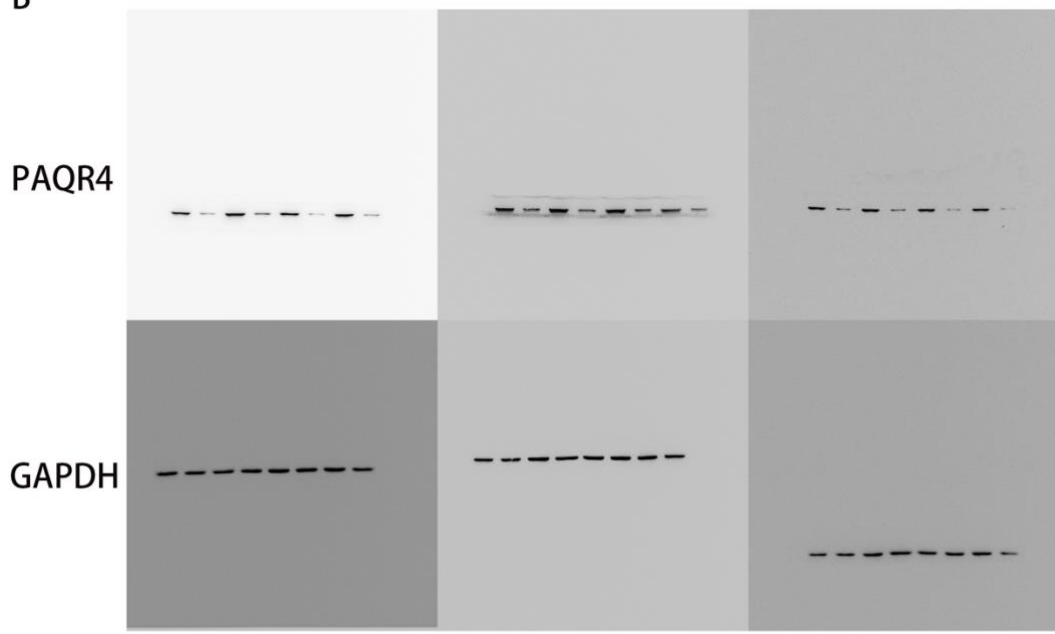

C

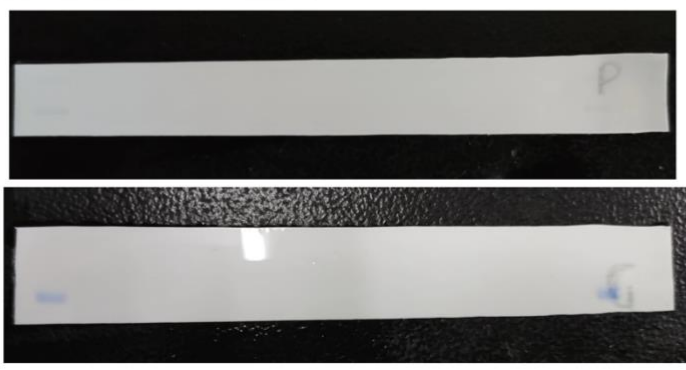

- **Supplementary Figure 5.** Complete results of Western blot. (A) Sample order: CAKI, 786-O, 5637, T24, CAKI, 786-O, 5637, T24. (B) Sample order: 786-O siNC, 786-O si1, T24 siNC, T24 si1, 786-O siNC, 786-O si1, T24 siNC, T24 si1. (C) Example of blots after cutting.
